# Supplementary material
Source: MDPI journal article supplement (https://www.mdpi.com/2073-4395/12/8/1860)
Supplement: s1 [file s1]

**Table S1.** Morphophysiological traits of two rice cultivars (C) as affected by irrigations (I), salicylic acid rates (SA), and their interaction.

| Factors                | RL          | PH          | RV                 | NL          | FLA                | SDW         | RDW         | Chl. A                  | Chl. B                  | Carotenoids             |
|------------------------|-------------|-------------|--------------------|-------------|--------------------|-------------|-------------|-------------------------|-------------------------|-------------------------|
|                        | (cm)        |             | (mm <sup>3</sup> ) |             | (cm <sup>2</sup> ) | (g)         | (g)         | (mg g <sup>-1</sup> FW) | (mg g <sup>-1</sup> FW) | (mg g <sup>-1</sup> FW) |
| NI×C1×SA0              | 24.20±0.10a | 95.57±0.92a | 37.60±0.45a        | 46.00±1.00a | 39.04±0.93a        | 20.47±0.86a | 13.12±0.56a | 42.67±1.09a             | 21.22±1.08a             | 11.60±0.23g             |
| NI×C1×SA1              | 25.65±0.20a | 96.05±1.56a | 38.53±0.58a        | 50.83±0.93a | 39.73±0.21a        | 22.29±0.21a | 14.05±0.40a | 43.83±0.73a             | 23.28±0.51a             | 13.35±0.46f             |
| NI×C1×SA2              | 30.13±0.55a | 97.17±0.93a | 40.70±0.82a        | 57.33±2.68a | 42.12±0.48a        | 25.51±0.51  | 17.68±0.07a | 46.50±0.76a             | 26.13±0.14a             | 15.87±0.31de            |
| NI×C1×SA3              | 23.55±0.36a | 94.33±0.17a | 36.92±1.08a        | 49.67±0.17a | 38.57±0.81a        | 20.98±1.33a | 13.30±0.40a | 41.17±0.17a             | 20.68±1.04a             | 11.250±0.88g            |
| NI×C2×SA0              | 27.15±0.35a | 95.70±1.08a | 47.05±0.18a        | 79.33±3.17a | 38.57±0.54a        | 25.80±0.91a | 18.69±1.23a | 58.50±1.00a             | 26.17±0.93a             | 15.50±0.51e             |
| NI×C2×SA1              | 27.43±2.26a | 94.55±0.75a | 47.47±0.16a        | 80.33±3.59a | 38.62±0.78a        | 26.60±0.15a | 18.55±1.01a | 58.50±0.01a             | 32.00±1.00a             | 20.50±1.00ab            |
| NI×C2×SA2              | 30.73±0.83a | 95.37±0.43a | 50.08±0.52a        | 84.17±1.01a | 40.38±0.63a        | 29.70±0.83a | 20.21±0.42a | 64.50±0.58a             | 33.00±0.29a             | 21.50±0.58a             |
| NI×C2×SA3              | 26.68±1.29a | 94.07±0.99a | 46.35±0.15a        | 78.00±1.26a | 38.53±1.14a        | 24.48±0.24a | 18.13±0.71a | 55.50±1.00a             | 31.00±0.01a             | 19.50±1.00b             |
| DI×C1×SA0              | 15.05±0.43a | 69.69±2.18a | 16.15±0.98a        | 28.67±1.09a | 25.73±0.72a        | 10.69±0.79a | 7.26±0.57a  | 39.29±0.17a             | 22.89±1.37a             | 14.69±0.85ef            |
| DI×C1×SA1              | 16.65±1.03a | 72.63±0.99a | 17.70±1.33a        | 30.83±1.42a | 30.87±1.06a        | 11.41±0.21a | 8.06±0.19a  | 43.73±0.62a             | 24.74±0.65a             | 17.36±0.30cd            |
| DI×C1×SA2              | 19.90±0.28a | 86.88±0.14a | 21.17±0.16a        | 39.67±1.20a | 35.46±1.53a        | 14.14±0.06a | 11.94±0.44a | 46.13±0.51a             | 26.65±0.03a             | 17.97±0.99cd            |
| DI×C1×SA3              | 16.00±0.76a | 74.05±0.48a | 16.35±0.36a        | 27.67±0.73a | 26.45±0.92a        | 10.35±0.49a | 7.09±0.19a  | 40.66±0.95a             | 21.53±0.59a             | 13.33±0.30f             |
| DI×C2×SA0              | 22.70±1.28a | 75.17±0.41a | 33.67±0.82a        | 60.50±2.25a | 43.69±1.56a        | 19.29±0.06a | 14.25±0.47a | 39.63±0.52a             | 24.03±1.03a             | 16.90±0.40d             |
| DI×C2×SA1              | 23.15±0.60a | 77.60±0.80a | 35.40±1.42a        | 69.17±1.45a | 44.41±0.42a        | 20.47±0.73a | 14.18±0.33a | 42.93±0.92a             | 25.59±1.09a             | 17.20±0.49c             |
| DI×C2×SA2              | 24.43±1.04a | 83.82±1.41a | 39.73±1.35a        | 75.33±2.09a | 47.80±1.34a        | 22.28±0.51a | 16.61±0.56a | 47.58±1.18a             | 27.12±0.26a             | 19.12±0.22b             |
| DI×C2×SA3              | 21.13±0.76a | 76.93±1.88a | 33.77±0.32a        | 57.83±3.09a | 42.83±1.08a        | 20.79±1.32a | 14.28±0.03a | 39.67±1.26a             | 22.40±1.36a             | 14.92±0.82f             |
| P-value for I × V × SA | NS          | NS          | NS                 | NS          | NS                 | NS          | NS          | NS                      | NS                      | *                       |

\*p ≤ 0.05 and NS: indicates the non-significant differences. SA<sub>0</sub>, SA<sub>1</sub>, SA<sub>2</sub>, SA<sub>3</sub> represent 0, 400, 700 and 1000 µM of SA, respectively, RL: root length, PH: plant height, RV: root volume, NL: number of leaves, FLA: flag leaf area, SDW: shoot dry weight, RDW: root dry weight, Chl. A: Chlorophyll A, and Chl. B: Chlorophyll B.

**Table S2.** Grain yield and its components traits of two rice cultivar (C) as affected by irrigations conditions (I), salicylic acid rates (SA), and their interaction

| Factors    | NP          | HD (day)    | PL (cm)     | FGP (Panicle <sup>-1</sup> ) | IGP         | PW (g)     | 100-GW     | GY plant <sup>-1</sup> | GY (t ha <sup>-1</sup> ) | WP kg m <sup>-3</sup> |
|------------|-------------|-------------|-------------|------------------------------|-------------|------------|------------|------------------------|--------------------------|-----------------------|
| NI×C1×SA0  | 17.83±0.17a | 94.33±0.73a | 21.70±0.31a | 108.50±0.58a                 | 8.00±1.61a  | 2.78±0.04a | 2.75±0.01a | 46.85±1.00a            | 11.38±0.58a              | 0.76±0.36a            |
| NI×C1×SA1  | 18.00±0.29a | 93.17±0.73a | 22.32±0.25a | 111.50±2.36a                 | 6.17±1.83a  | 2.89±0.05a | 2.79±0.01a | 47.92±0.25a            | 11.65±0.28a              | 1.12±0.01a            |
| NI×C1×SA2  | 18.83±0.44a | 92.33±0.6a  | 22.77±0.38a | 123.67±1.59a                 | 1.50±0.29a  | 3.04±0.05a | 2.85±0.01a | 51.62±1.82a            | 12.57±0.22a              | 1.20±0.04a            |
| NI×C1×SA3  | 17.33±0.67a | 92.67±0.44a | 22.08±0.04a | 103.00±3.01a                 | 12.33±1.69a | 2.67±.19a  | 2.76±0.01a | 44.83±1.01a            | 11.21±0.25a              | 1.05±0.02a            |
| NI×C2×SA0  | 22.17±0.83a | 95.00±1.50a | 22.40±0.63a | 175.67±0.93a                 | 8.55±0.48a  | 4.02±0.20a | 2.63±0.02a | 46.70±0.06a            | 11.68±0.01a              | 1.09±0.01a            |
| NI×C2×SA1  | 22.50±1.00a | 94.33±0.17a | 22.92±0.17a | 179.67±1.09a                 | 6.97±0.32a  | 4.08±0.08a | 2.65±0.02a | 48.02±1.08a            | 12.00±0.27a              | 1.12±0.03a            |
| NI×C2×SA2  | 23.50±0.29a | 93.33±0.44a | 24.40±0.56a | 185.83±2.05a                 | 2.85±0.55a  | 4.41±0.14a | 2.71±0.01a | 50.47±0.74a            | 12.62±0.19a              | 1.18±0.02a            |
| NI×C2×SA3  | 21.83±0.33a | 94.67±0.17a | 22.47±0.49a | 166.17±5.17a                 | 11.08±3.01a | 4.02±0.20a | 2.59±0.01a | 46.08±2.31a            | 11.52±0.58a              | 1.08±0.05a            |
| DI×C1×SA0  | 9.00±0.29a  | 92.00±0.29a | 15.58±0.52a | 61.16±0.35a                  | 49.00±5.00a | 1.50±0.02a | 2.36±0.01a | 28.06±0.09a            | 7.02±0.02a               | 1.56±0.01a            |
| DI×C1×SA1  | 10.00±0.29a | 90.67±0.17a | 16.03±0.24a | 65.94±0.75a                  | 36.00±1.61a | 1.59±0.04a | 2.48±0.02a | 29.13±1.12a            | 7.28±0.28a               | 1.62±0.06a            |
| DI×C1×SA2  | 11.17±0.17a | 90.83±0.88a | 18.45±0.58a | 75.85±0.52a                  | 26.67±0.60a | 1.92±0.12a | 2.65±0.03a | 34.09±1.56a            | 8.52±0.39a               | 1.89±0.09a            |
| DI×C1×SA3  | 8.60±0.25a  | 89.67±0.44a | 16.01±0.29a | 61.16±1.79a                  | 50.83±4.53a | 1.53±0.03a | 2.45±0.03a | 26.62±0.71a            | 6.65±0.18a               | 1.48±0.04a            |
| DI×C2×SA0  | 15.83±0.17a | 92.67±0.17a | 20.38±0.09a | 138.17±4.92a                 | 23.75±2.85a | 3.27±0.16a | 2.45±0.02a | 35.78±1.09aa           | 8.94±0.27a               | 1.89±0.14a            |
| DI×C2×SA1  | 16.17±0.60a | 92.33±0.73a | 20.95±0.22a | 146.00±2.31a                 | 19.63±0.57a | 3.50±0.06a | 2.48±0.01a | 36.42±0.16a            | 9.10±0.04a               | 2.02±0.01a            |
| DI×C2×SA2  | 17.83±0.67a | 92.67±0.17a | 22.40±0.88a | 158.67±6.83a                 | 12.35±1.90a | 4.05±0.21a | 2.59±0.02a | 39.75±0.63a            | 9.94±0.16a               | 2.21±0.03a            |
| DI×C2×SA3  | 15.83±0.83a | 93.67±0.67a | 20.47±0.12a | 135.83±2.59a                 | 21.22±3.64a | 3.56±0.12a | 2.45±0.04a | 35.15±0.74a            | 8.79±0.18a               | 1.95±0.04a            |
| P-value    |             |             |             |                              |             |            |            |                        |                          |                       |
| I × V × SA | NS          | NS          | NS          | NS                           | NS          | NS         | NS         | NS                     | NS                       | NS                    |

NS indicates a non-significant difference. SA<sub>0</sub>, SA<sub>1</sub>, SA<sub>2</sub>, SA<sub>3</sub> represent 0, 400, 700 and 1000 µM of SA respectively, NP: number of panicle; HD: heading date, PL: panicle length, FGP: fertile grain panicle<sup>-1</sup>, IGP: infertile grain panicle<sup>-1</sup>, PW: panicle weight, 100-GW: 100-grain weight, GYP: grain yield plant<sup>-1</sup>, GYH: grain yield, and WP: water productivity.
